# Supplementary material
Source: Elsevier journal article supplement (https://www.sciencedirect.com/science/article/pii/S2605153221000066)

SUPPLEMENTARY DATA

Table 1 of the supplementary data - AS echocardiographic parameters at the time of AVR according to initial AVA group.

|                                                          | Global<br>N = 72 | AVA < 0.75<br>cm <sup>2</sup><br>N = 30 | AVA 0.75 – 1<br>cm <sup>2</sup><br>N = 36 | AVA > 1<br>cm <sup>2</sup><br>N = 6 | P    |
|----------------------------------------------------------|------------------|-----------------------------------------|-------------------------------------------|-------------------------------------|------|
| Aortic jet velocity, m/s                                 | 4.6 (0.5)        | 4.7 (0.5)                               | 4.5 (0.5)                                 | 4.8 (0.7)                           | .359 |
| Mean aortic gradient, mmHg                               | 54.7 (13.2)      | 56.2 (13.2)                             | 53.0 (12.8)                               | 57.3 (15.8)                         | .555 |
| Aortic valve area, cm <sup>2</sup>                       | 0.63 (0.21)      | 0.54 (0.14)                             | 0.70 (0.21)                               | 0.66 (0.43)                         | .010 |
| Aortic valve area index, cm <sup>2</sup> /m <sup>2</sup> | 0.37 (0.13)      | 0.33 (0.09)                             | 0.41 (0.12)                               | 0.36 (0.24)                         | .056 |
| Dimensionless index                                      | 0.19 (0.05)      | 0.18 (0.05)                             | 0.20 (0.05)                               | 0.18 (0.05)                         | .225 |
| Indexed stroke volume, mL/m <sup>2</sup>                 | 41.1 (12.1)      | 37.5 (8.8)                              | 43.6 (12.0)                               | 41.5 (25.9)                         | .148 |
| LVEF, %                                                  | 61.4 (7.5)       | 62.8 (7.4)                              | 60.5 (7.7)                                | 59.3 (5.5)                          | .367 |

AS: aortic stenosis, AVR: aortic valve replacement, AVA: aortic valve area.

Figure 1 of the supplementary data - Survival from mortality and/or AVR curves according to AVAi group. AVAi: indexed aortic valve area.

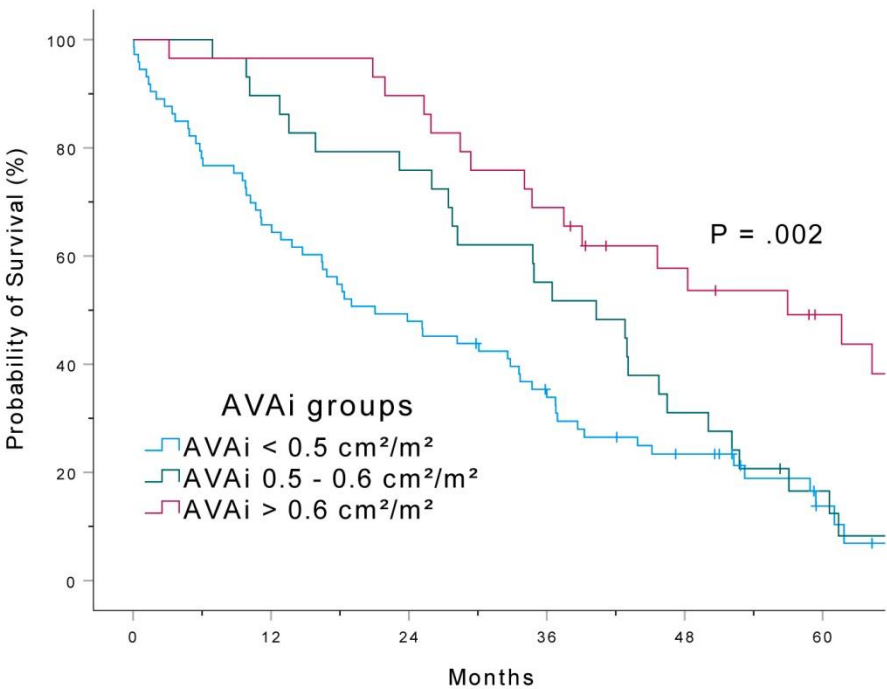

**Figure 2 of the supplementary data - Survival from mortality/AVR curves according to combined AVA and SV<sub>i</sub> parameters. AVA: aortic valve area; SV<sub>i</sub>: indexed stroke volume.**

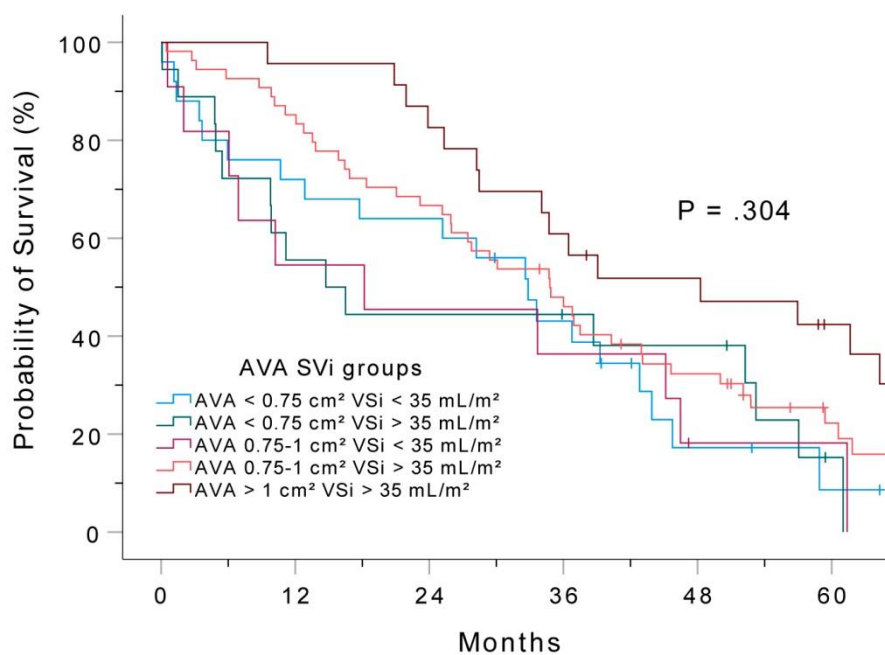

Supplement: mmc1 [file S2605153221000066:mmc1.pdf]
